# Supplementary material
Source: bioRxiv or medRxiv preprint supplement (https://medrxiv.org/highwire/filestream/83697/field_highwire_adjunct_files/0/2020.05.29.20115451-1.pdf)
Supplement: Supplementary file [file 2020.05.29.20115451-1.pdf]

## SUPPLEMENTARY INFORMATION

### SUPPLEMENTARY METHODS AND MATERIALS

#### *Neuroimaging*

##### **Structural MRI data preprocessing and analyses**

Diffusion weighted imaging (DWI) scans were converted from the native DICOM to NIFTI format using the dcm2nii tool developed at the McCauseland Centre for Neuroimaging (<http://www.mccauslandcenter.sc.edu/mricro/mricron/dcm2nii.html>). Each image was visually checked gradient by gradient and slice by slice. One participant was excluded due to artefacts linked to head motion, and one participant was excluded due to difficulties characterising corpus callosum malformation. DWI data sets were preprocessed for tractography using MRtrix 3 (1). DWI data denoising, eddy current-induced distortion correction, motion correction and bias field correction were performed on the two different shells independently. In order to remove non-brain tissue components and background noise, b0 images for the two shells were extracted using Brain Extraction Tool (BET2) compiled in FSL (2). Images from the two shells were then coregistered using FreeSurfer and merged using FSL. An in-house global normalisation procedure of the two shell DWI data was performed (3). Tractography and connectome reconstruction were done using MRtrix 3 (1, 4, 5). The Tax algorithm was used for single-fibre voxel selection and response function estimation (6). The second order integration over fibre orientation distributions (iFOD2) algorithm was estimated using constrained spherical [deconvolution](#) with default parameters (4). Probabilistic tractograms of one million streamlines were generated over the entire brain, with subsequent filtering to 100 thousands streamlines using Spherical Deconvolution Informed Filtering of Tractograms (SIFT) to improve the accuracy of the reconstructed whole-brain connectome(7). For each participant, the structural connectome matrix was generated from the resulting tractography using the registered Brainnetome Atlas (8). Two 246 × 246 connectivity matrices were obtained using the following connectivity metrics: a) number of streamlines weighted for sum of the volumes of the connected regions; and b) average fractional anisotropy (FA), a quantitative measure of directionality of the diffusion. The two obtained symmetric matrices will be referred to as structural connectivity (SC). Based on the SC matrices created, the average connectivity value for all inter-hemispheric connections (left-right), as well as for all intra-hemispheric connections (right to right and left to left) were computed for each participant. In addition, a lobe-wise SC analysis was performed, by computing the connectivity (the same two metrics) for left and right frontal lobes to all intra-hemispheric lobes, and to all contralateral lobes. Lobe-wise SC was computed similarly for temporal, parietal and occipital lobes.

##### **Functional MRI data preprocessing and analyses**

Resting-state functional MRI (fMRI) data were converted from the native DICOM to NIFTI format using dcm2nii. In each participant, the first 5 (of the 196) volumes were discarded to ensure magnetisation equilibrium, and the remainder underwent spatial realignment and smoothing (5mm FWHM Gaussian kernel) using SPM12 (Wellcome Centre for Human

Neuroimaging, University College London, UK, <http://www.fil.ion.ucl.ac.uk/spm/software/spm12>). For resting-state fMRI data, the mean framewise displacement for each frame was computed to quantify the extent of head motion from volume to volume for each participant (9, 10). Following Power et al. recommendations (2012; 2014), we implemented volume censoring ('scrubbing') for motion correction using a framewise displacement of 0.5 mm threshold for exclusion. Participants with less than 125 frames remaining after scrubbing were excluded. Using this approach, three AgCC and one TDC participants were removed from further analyses. The following steps were performed on the scrubbed data of all remaining participants. We followed the preprocessing pipeline described by Preti and Van De Ville (2017). Voxelwise timecourses were first detrended (linear and quadratic trends). The 6 motion parameters, as well as the average white matter and cerebrospinal fluid signals obtained from standard white matter and ventricular masks mapped to the subjects' fMRI space and masked with individual segmentation maps, were regressed out using the DPARSF toolbox (11). The timecourses were then band-pass filtered in the range of [0.01 0.15 Hz] to enhance resting-state fluctuations. To restrict the analysis to voxels belonging to grey matter, the segmented grey matter T1 image obtained using SPM12 was resliced and coregistered to each individual's mean functional image, and used as a mask. The Brainnetome Atlas was also resliced and coregistered to each individual's T1 image coregistered to the mean functional image. Quality check of the coregistration of the Atlas to the individual's T1 image coregistered to the mean functional image were carefully done for cortical and subcortical regions. Region-averaged time series were extracted in each participant's individual space. We computed pairwise Pearson correlation coefficients between all pairs of the Brainnetome atlas regions to obtain a symmetric correlation matrix of 246 x 246 for each participant, referred to as functional connectivity (FC) for the remainder of this paper. Similarly to the SC measures, average FC values of all inter-hemispheric connections (left-right), and intra-hemispheric connections (right to right and left to left) were computed for each participant. In addition, lobe-wise FC was computed for left and right frontal lobes to all intra-hemispheric lobes, as well as for left and right frontal lobes to all contralateral lobes. Lobe-wise FC was similarly computed for temporal, parietal and occipital lobes.

### **Neurobehavioural outcome measures**

Associations with brain structural and functional connectivity and variation in neurobehavioural outcomes were examined using measures administered as part of the "Paediatric Agenesis of the Corpus Callsum Project" assessing five neurobehavioural domains; general cognitive functioning, short-term and working memory, executive and attentional functions, learning and memory, as well as social functions. Three measures were not included because there was a large amount of missing data (i.e., Tower Test from the Delis-Kaplan Executive Function System, D-KEFS (12); California Verbal Learning Test – Children's Version, CVLT-C (13); Dot location subtest from the Children's Memory Scale, CMS (14)). A subset of 33 age-standardised neurobehavioural scores from clinical tests and parent-reported questionnaires were included in the Partial Least Squares Correlation analysis.

## **Statistical analyses**

To evaluate associations between connectivity (i.e., intra- and inter-hemispheric SC and FC) and neurobehavioural measures, we used Partial Least Squares Correlation (PLSC) analyses. PLSC is a multivariate data-driven statistical technique that maximises the covariance between two matrices by deriving latent components, which are optimal linear combinations of the original matrices (15) and described in previous work (16, 17). The neurobehavioural (behaviour) and brain connectivity variables were first z-scored within each group (AgCC and TDC). The upper triangular part of the FC and SC matrices were vectorised, and both structural connectivity vectors (containing FA measures and number of streamlines) were stacked together. A covariance matrix (which is effectively a correlation matrix, since the data is z-scored) was then computed between the neurobehavioural and brain connectivity matrices for each group. Singular value decomposition was then applied to this correlation matrix, resulting in components (CorrComps). Each CorrComp is composed of a set of neurobehavioural weights (different for each group) and brain connectivity weights (common to all participants), which indicate how strongly each neurobehavioural and brain connectivity variable contribute to the multivariate brain connectivity- neurobehavioural association. Therefore, each group has its own neurobehavioural pattern associated to a common brain connectivity pattern across both the AgCC and TDC groups. The significance of CorrComps was determined by permutation testing (1000 permutations). Stability of neurobehavioural and brain connectivity weights was estimated using bootstrapping (500 bootstrap samples with replacement). Bootstrap ratio z-scores for each neurobehavioural and brain connectivity variables were obtained by dividing each neurobehavioural and brain connectivity weight by its bootstrap-estimated standard deviation, and a p-value was obtained for each bootstrap ratio z-score. The contribution of neurobehavioural and brain connectivity weights for a given CorrComp was considered robust at  $p < 0.01$  (i.e., absolute bootstrap ratio z-scores above 3).

## SUPPLEMENTARY TABLES AND FIGURES

**Table S1.** Neurobehavioural measures included in the Partial Least Square (PLS) analyses

| Tests and Description                                                                                                                                                                                                                                                                                                                                |  | Scores (using standardised scores)                                  | Name of variable included in PLS |
|------------------------------------------------------------------------------------------------------------------------------------------------------------------------------------------------------------------------------------------------------------------------------------------------------------------------------------------------------|--|---------------------------------------------------------------------|----------------------------------|
| a) General Cognitive Functioning                                                                                                                                                                                                                                                                                                                     |  |                                                                     |                                  |
| <i>Wechsler Abbreviated Intelligence Scale (WASI) (18) or Wechsler Intelligence Scale for Children, 4th edition (WISC-IV) (19)</i><br>Measure of general intelligence. The scores (Full-Scale, Performance and Verbal Intellectual Quotient) are generated from the four subtests version of the WASI or from the WISC-IV (n=3) based on 10 subtests |  | Full-Scale IQ                                                       | FSIQ                             |
|                                                                                                                                                                                                                                                                                                                                                      |  | Performance IQ                                                      | PIQ                              |
|                                                                                                                                                                                                                                                                                                                                                      |  | Verbal IQ                                                           | VIQ                              |
| b) Verbal short term and working memory                                                                                                                                                                                                                                                                                                              |  |                                                                     |                                  |
| <i>Digit Span (Wechsler Intelligence Scale for Children, 4th edition (WISC-IV) (19)</i>                                                                                                                                                                                                                                                              |  |                                                                     |                                  |
| <i>Subtest: Digit Span Forward</i><br>Measure of verbal short-term memory. The child heard a sequence of digits, at the rate of one digit every second and attempted to repeat the sequence in the original order                                                                                                                                    |  | Number of digits repeated in the same order                         | Short-term memory                |
| <i>Subtest: Digit Span Backward</i><br>Measure of verbal working memory. The child immediately repeats a spoken string of digits in the reverse order, and the number of correct trials was the variable of interest                                                                                                                                 |  | Number of digits repeated in the reverse order                      | Working memory                   |
| <i>Subtest: Digit Span total score</i>                                                                                                                                                                                                                                                                                                               |  | Total number of digits repeated in the same order and reverse order | Digit span total                 |
| c) Executive and attention functions                                                                                                                                                                                                                                                                                                                 |  |                                                                     |                                  |
| <i>Test of Everyday Attention for Children (TEA-Ch) (20)</i>                                                                                                                                                                                                                                                                                         |  |                                                                     |                                  |
| <i>Subtest: Sky Search</i><br>Measure of visual search task of selective attention. The child circles target spaceships among distracters as quickly as possible. This subtest is scored according to the accuracy and speed of the child's search. A control for motor speed is included                                                            |  | Number of correctly identified targets                              | Visual scanning spaceships       |
|                                                                                                                                                                                                                                                                                                                                                      |  | Time per target                                                     | Visual search speed              |
|                                                                                                                                                                                                                                                                                                                                                      |  | Global score for selective attention                                | Visual selective attention       |
| <i>Subtest: Score !</i><br>Measure of sustained auditory attention. The child counts scoring sounds on an audiotape                                                                                                                                                                                                                                  |  | Number of correctly identified sounds                               | Sustained auditory attention     |
| <i>Subtest: Sky Search DT</i><br>Measure of multimodal divided attention. The child simultaneously completes the Sky Search and Score! subtests                                                                                                                                                                                                      |  | Dual task decrement score                                           | Dual task                        |
| <i>Subtest: Score DT</i><br>Measure of divided auditory attention. The child completes the Score! subtest while simultaneously listening for an animal name in the news report on an audiotape                                                                                                                                                       |  | Total correctly identified sounds and animal names                  | Divided auditory attention       |

|                                                             |                                                                                                                                                                                                                                                                                                                                                                                                                                                                                                                                                                                                                                                                                                                                                                                                     |                                                                                                                                                                            |                                                                                                                                     |
|-------------------------------------------------------------|-----------------------------------------------------------------------------------------------------------------------------------------------------------------------------------------------------------------------------------------------------------------------------------------------------------------------------------------------------------------------------------------------------------------------------------------------------------------------------------------------------------------------------------------------------------------------------------------------------------------------------------------------------------------------------------------------------------------------------------------------------------------------------------------------------|----------------------------------------------------------------------------------------------------------------------------------------------------------------------------|-------------------------------------------------------------------------------------------------------------------------------------|
|                                                             | <p><i>Subtest: Walk don't Walk</i><br/>Measure of inhibition. The child marks a box in response to a go signal on an audiotape, and inhibits the response to a no-go signal</p>                                                                                                                                                                                                                                                                                                                                                                                                                                                                                                                                                                                                                     | Total correct trials                                                                                                                                                       | Inhibition                                                                                                                          |
| <i>Delis-Kaplan Executive Function System (D-KEFS) (12)</i> |                                                                                                                                                                                                                                                                                                                                                                                                                                                                                                                                                                                                                                                                                                                                                                                                     |                                                                                                                                                                            |                                                                                                                                     |
|                                                             | <p><i>Subtest: Trail Making Test</i><br/>Measure of processing speed and cognitive switching.<br/>Visual Scanning condition, the child draws a line through all of the 3s among distracters.<br/>Number Sequencing condition, the child draws a line connecting the numbers 1 through 16 in order among distracters.<br/>Letter Sequencing condition, the child draws a line connecting the letters A through P in alphabetical order among distracters.<br/>Number-Letter Switching condition, the child draws a line switching back and forth between connecting numbers and letters (i.e., 1 -A - 2 - B through 16 - P).<br/>Motor Speed condition, the child traces over a dotted line connecting circles.<br/>In all conditions, the child works as quickly and as accurately as possible.</p> | <p>Visual scanning numbers<br/>Number sequencing<br/>Letter sequencing<br/>Number-Letter switching<br/>Motor speed</p>                                                     | <p>Visual scanning numbers<br/>Number sequencing<br/>Letter sequencing<br/>Switching<br/>Motor speed</p>                            |
|                                                             | <p><i>Verbal Fluency</i><br/>Measure of verbal fluency and cognitive switching.<br/>Letter Fluency condition, the child verbally generates items starting with a specific letter<br/>Category Fluency condition, the child verbally generates items from a specific category.<br/>Category switching condition, the child generates items alternating between two different categories.<br/>In all conditions, the child generates items in 60 seconds.</p>                                                                                                                                                                                                                                                                                                                                         | <p>Number of word starting with a specific letter generated<br/>Number of word from the category generated<br/>Switching total correct response<br/>Switching accuracy</p> | <p>Letter fluency<br/>Category fluency<br/>Verbal switching<br/>Verbal switching accuracy</p>                                       |
|                                                             | <p><i>Colour-Word Interference</i><br/>Measure of processing speed, inhibition, and cognitive switching<br/>Color-naming condition, the child names colour patches as quickly as possible<br/>Color-reading condition, the child reads the colour name as quickly as possible.<br/>Interference condition, the child names the ink colour that the word is printed in and does not read the incongruent colour word.<br/>Switching-Interference condition, the child follows the rules of the Interference conditions and switches the rule when the word is presented in a box.</p>                                                                                                                                                                                                                | <p>Number of colour named<br/>Number of colour read<br/>Interference task<br/>Inhibition/Switching</p>                                                                     | <p>Colour naming<br/>Colour reading<br/>Interference task<br/>Inhibition switching</p>                                              |
| d) Verbal learning and memory                               |                                                                                                                                                                                                                                                                                                                                                                                                                                                                                                                                                                                                                                                                                                                                                                                                     |                                                                                                                                                                            |                                                                                                                                     |
| <i>Children's Memory Scale (CMS) (14)</i>                   |                                                                                                                                                                                                                                                                                                                                                                                                                                                                                                                                                                                                                                                                                                                                                                                                     |                                                                                                                                                                            |                                                                                                                                     |
|                                                             | <p><i>Subtest: Word-pairs</i><br/>Measure of verbal learning and memory.<br/>The child listens to a list of spoken word-pairs, is then presented with one word from the word-pair and names the other word in the pair. Following three trials, the child recalls as many of the word-pairs as possible without cueing. After a delay, the child recalls the word-pairs without cues. Lastly the child identifies the learned word-pairs from a list of learned and new word-pairs.</p>                                                                                                                                                                                                                                                                                                             | <p>Learning score<br/>Immediate recall<br/>Total recall<br/>Long delay recall<br/>Delay recognition</p>                                                                    | <p>Verbal learning<br/>Verbal immediate recall<br/>Verbal total recall<br/>Verbal delayed recall<br/>Verbal delayed recognition</p> |

|                                              |                                                                                                                                                                                                                                                                   |                         |
|----------------------------------------------|-------------------------------------------------------------------------------------------------------------------------------------------------------------------------------------------------------------------------------------------------------------------|-------------------------|
| e) Social functions                          |                                                                                                                                                                                                                                                                   |                         |
| <i>Social Skills Improvement System (21)</i> |                                                                                                                                                                                                                                                                   |                         |
|                                              | Measure of social skills and behaviour.<br>The child listens to a list of spoken word-pairs, is then presented Parents rate 79 items in a questionnaire to estimate aspects of their child's social skills and problem behaviours. The two main scales were used. | Social Skills scale     |
|                                              |                                                                                                                                                                                                                                                                   | Problem Behaviour scale |
|                                              |                                                                                                                                                                                                                                                                   | Social Skills           |
|                                              |                                                                                                                                                                                                                                                                   | Problem Behaviour       |

### Number of streamlines

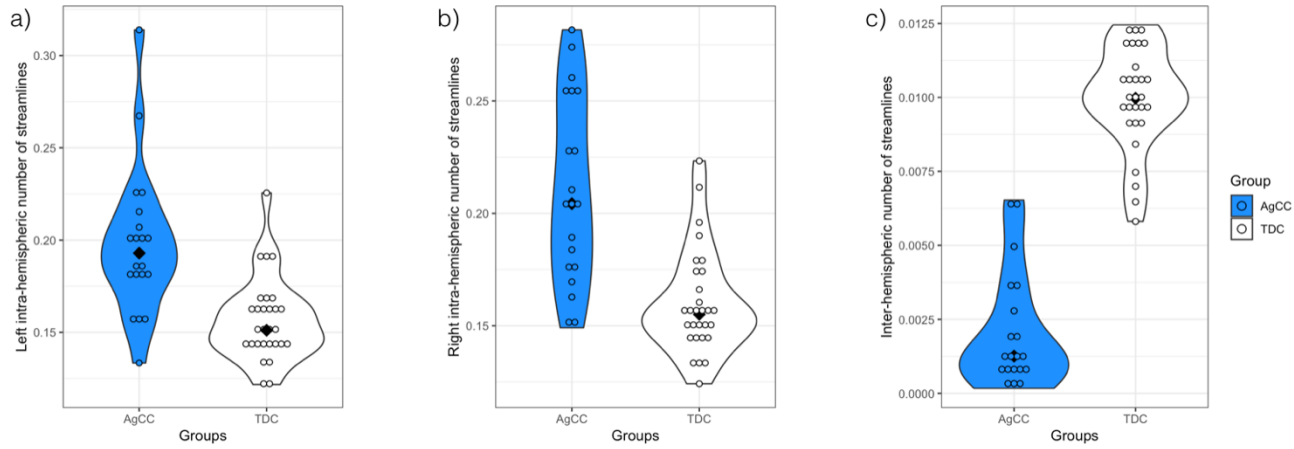

### Mean FA

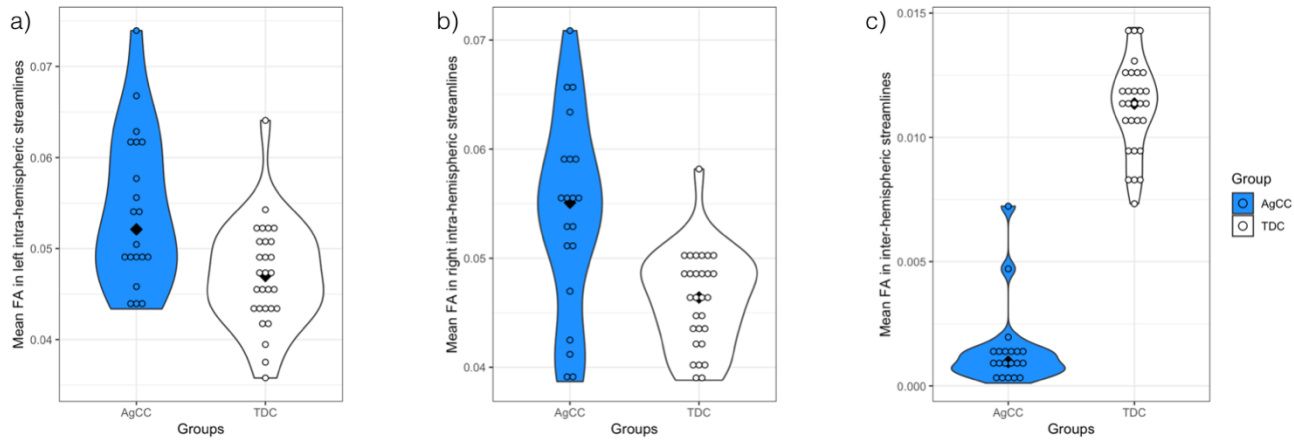

**Fig. S1.** Whole brain SC showing number of streamlines and mean FA along streamlines connecting a) left intra-hemispheric regions; b) right intra-hemispheric regions; and c) inter-hemispheric region, in children with AgCC (in blue) and typically developing controls (TDC, in white). Black square shows the median for each group.

**Table S2.** Whole Brain SC in the AgCC (n=20) and the TDC (n=29) groups

|                                               | AgCC (median) | TDC (median) | Group comparison |             |            |                    |
|-----------------------------------------------|---------------|--------------|------------------|-------------|------------|--------------------|
|                                               |               |              | W                | p           | r          | q                  |
| Number of streamlines                         |               |              |                  |             |            |                    |
| Left to left intra-hemispheric connectivity   | 0.1929        | 0.1511       | 486              | 0.0000286   | -0.5977614 | <b>0.00010725</b>  |
| Right to right intra-hemispheric connectivity | 0.2043        | 0.1551       | 498              | 0.000007278 | -0.6407702 | <b>0.000032109</b> |
| Left to right inter-hemispheric connectivity  | 0.0012613     | 0.009973     | 3                | 4.951e-13   | -1.032377  | <b>1.86e-11</b>    |
| FA                                            |               |              |                  |             |            |                    |
| Left to left intra-hemispheric connectivity   | 0.05211       | 0.04700      | 435              | 0.002704    | -0.428496  | <b>0.00676</b>     |
| Right to right intra-hemispheric connectivity | 0.05509       | 0.04640      | 456              | 0.0005157   | -0.4960673 | <b>0.001487596</b> |
| Left to right inter-hemispheric connectivity  | 0.0009688     | 0.011359     | 0                | 7.073e-14   | -1.069502  | <b>5.31e-12</b>    |

Note: Differences between the AgCC and TDC groups were examined using the Wilcoxon Signed-Ranks test. All p-values that survived false discovery rate (FDR) correction ( $q < 0.05$ ) are indicated in bold.



**Table S3.** Whole Brain SC in children with complete and partial AgCC (complete n=13, partial n=7)

|                                               | Complete AgCC<br>(median) | Partial AgCC (median) | Group comparison |        |                 |        |
|-----------------------------------------------|---------------------------|-----------------------|------------------|--------|-----------------|--------|
|                                               |                           |                       | W                | p      | r               | q      |
| Number of streamlines                         |                           |                       |                  |        |                 |        |
| Left to left intra-hemispheric connectivity   | 0.1851                    | 0.2002                | 36               | 0.4854 | -0.1559896      | 0.5511 |
| Right to right intra-hemispheric connectivity | 0.2020                    | 0.2105                | 34               | 0.3929 | -0.1910513      | 0.4753 |
| Left to right inter-hemispheric connectivity  | 0.001399                  | 0.001080              | 47               | 0.9385 | -<br>0.01726159 | 0.9385 |
| FA                                            |                           |                       |                  |        |                 |        |
| Left to left intra-hemispheric connectivity   | 0.05045                   | 0.06124               | 31               | 0.2749 | -0.2441331      | 0.4043 |
| Right to right intra-hemispheric connectivity | 0.05515                   | 0.05504               | 42               | 0.8168 | -0.0518026      | 0.8278 |
| Left to right inter-hemispheric connectivity  | 0.000810                  | 0.001596              | 24               | 0.0968 | -0.3713136      | 0.1962 |

Note: Differences between the AgCC and TDC groups were examined using the Wilcoxon Signed-Ranks test. All p-values that survived false discovery rate (FDR) correction ( $q < 0.05$ ) are indicated in bold.

**Table S4.** Whole Brain SC in children with isolated AgCC (n=7) and complex AgCC (n=13)

|                                               | Isolated AgCC (median) | Complex AgCC (median) | Group comparison |        |            |        |
|-----------------------------------------------|------------------------|-----------------------|------------------|--------|------------|--------|
|                                               |                        |                       | W                | p      | r          | q      |
| Number of streamlines                         |                        |                       |                  |        |            |        |
| Left to left intra-hemispheric connectivity   | 0.1856                 | 0.2002                | 33               | 0.3507 | -0.2086786 | 0.4595 |
| Right to right intra-hemispheric connectivity | 0.1838                 | 0.2105                | 26               | 0.1348 | -0.3343869 | 0.2592 |
| Left to right inter-hemispheric connectivity  | 0.001080               | 0.001884              | 33               | 0.3507 | -0.2086786 | 0.4595 |
| FA                                            |                        |                       |                  |        |            |        |
| Left to left intra-hemispheric connectivity   | 0.05377                | 0.04961               | 53               | 0.588  | -0.1211266 | 0.6125 |
| Right to right intra-hemispheric connectivity | 0.05504                | 0.05515               | 38               | 0.588  | -0.1211266 | 0.6125 |
| Left to right inter-hemispheric connectivity  | 0.000785               | 0.001128              | 38               | 0.588  | -0.1211266 | 0.6125 |

Note: Differences between the AgCC and TDC groups were examined using the Wilcoxon Signed-Ranks test. All p-values that survived false discovery rate (FDR) correction ( $q < 0.05$ ) are indicated in bold.

**Table S5.** SC of the different cortical regions in the AgCC (n=20) and TDC groups (n=29)

|                                               | AgCC (median) | TDC (median) | Group comparison |           |            |                  |
|-----------------------------------------------|---------------|--------------|------------------|-----------|------------|------------------|
|                                               |               |              | W                | p         | r          | q                |
| <b>FRONTAL REGION</b>                         |               |              |                  |           |            |                  |
| Number of streamlines                         |               |              |                  |           |            |                  |
| Left to left intra-hemispheric connectivity   | 0.10223       | 0.06193      | 487              | 2.565e-05 | -0.6012858 | <b>1.01e-04</b>  |
| Right to right intra-hemispheric connectivity | 0.11026       | 0.05630      | 536              | 3.006e-08 | -0.7915859 | <b>1.73e-07</b>  |
| Left to right inter-hemispheric connectivity  | 2.147e-04     | 0.015991     | 3                | 5.561e-09 | -0.8327776 | <b>5.76e-08</b>  |
| Right to left inter-hemispheric connectivity  | 4.135e-05     | 0.016417     | 9                | 1.044e-08 | -0.81763   | <b>7.83e-08</b>  |
| FA                                            |               |              |                  |           |            |                  |
| Left to left intra-hemispheric connectivity   | 0.04320       | 0.03176      | 483              | 3.944e-05 | -0.5872481 | <b>1.34e-04</b>  |
| Right to right intra-hemispheric connectivity | 0.04641       | 0.03059      | 503              | 3.942e-06 | -0.6591989 | <b>1.85e-05</b>  |
| Left to right inter-hemispheric connectivity  | 4.151e-04     | 0.01508      | 7                | 9.028e-09 | -0.8211507 | <b>7.52e-08</b>  |
| Right to left inter-hemispheric connectivity  | 0.0001584     | 0.014769     | 2                | 4.457e-09 | -0.8380405 | <b>5.57e-08</b>  |
| <b>PARIETAL REGION</b>                        |               |              |                  |           |            |                  |
|                                               | AgCC          | TDC          | W                | p         | r          |                  |
| Number of streamlines                         |               |              |                  |           |            |                  |
| Left to left intra-hemispheric connectivity   | 0.15056       | 0.08982      | 479              | 5.981e-05 | -0.5733637 | <b>1.95e-04</b>  |
| Right to right intra-hemispheric connectivity | 0.1817        | 0.10270      | 525              | 1.844e-07 | -0.7449112 | <b>9.88e-07</b>  |
| Left to right inter-hemispheric connectivity  | 0.0001291     | 0.0001888    | 12               | 1.438e-08 | -0.8098272 | <b>9.80e-08</b>  |
| Right to left inter-hemispheric connectivity  | 0.0001106     | 0.013536     | 15               | 2.286e-08 | -0.7984065 | <b>1.43e-07</b>  |
| FA                                            |               |              |                  |           |            |                  |
| Left to left intra-hemispheric connectivity   | 0.05345       | 0.04489      | 472              | 0.0001201 | -0.5494064 | <b>0.0003603</b> |
| Right to right intra-hemispheric connectivity | 0.06375       | 0.04548      | 453              | 0.0006645 | -0.4862598 | <b>0.002816</b>  |
| Left to right inter-hemispheric connectivity  | 0.0000815     | 0.02265      | 2                | 4.278e-09 | -0.8390101 | <b>5.57e-08</b>  |
| Right to left inter-hemispheric connectivity  | 0.0003485     | 0.02179      | 4                | 6.143e-09 | -0.8304009 | <b>5.76e-08</b>  |
| <b>TEMPORAL REGION</b>                        |               |              |                  |           |            |                  |
|                                               | AgCC          | TDC          | W                | p         | r          |                  |
| Number of streamlines                         |               |              |                  |           |            |                  |
| Left to left intra-hemispheric connectivity   | 0.2540        | 0.16163      | 497              | 8.201e-06 | -0.6371229 | <b>3.42E-05</b>  |
| Right to right intra-hemispheric connectivity | 0.2530        | 0.1664       | 503              | 3.942e-06 | -0.6591989 | <b>1.85E-05</b>  |
| Left to right inter-hemispheric connectivity  | 0.0001291     | 0.0001888    | 221              | 0.1626    | -0.199488  | 0.2974           |
| Right to left inter-hemispheric connectivity  | 0.0001757     | 0.0003620    | 186              | 0.03516   | -0.3009232 | 0.0733           |
| FA                                            |               |              |                  |           |            |                  |
| Left to left intra-hemispheric connectivity   | 0.04858       | 0.03811      | 476              | 8.104e-05 | -0.5630452 | <b>2.53e-04</b>  |
| Right to right intra-hemispheric connectivity | 0.04517       | 0.03906      | 450              | 0.0008513 | -0.4765073 | <b>0.00228</b>   |
| Left to right inter-hemispheric connectivity  | 0.0002463     | 0.0006075    | 178              | 0.02303   | -0.3247141 | 0.0508           |

|                                               |           |           |     |           |            |                 |
|-----------------------------------------------|-----------|-----------|-----|-----------|------------|-----------------|
| Right to left inter-hemispheric connectivity  | 3.137e-04 | 0.0010260 | 129 | 0.001089  | -0.466649  | <b>0.002816</b> |
| <b>OCCIPITAL REGION</b>                       | AgCC      | TDC       | W   | p         | r          |                 |
| Number of streamlines                         |           |           |     |           |            |                 |
| Left to left intra-hemispheric connectivity   | 0.2541    | 0.1741    | 418 | 0.008597  | -0.375382  | <b>0.0201</b>   |
| Right to right intra-hemispheric connectivity | 0.25702   | 0.2185    | 366 | 0.1254    | -0.2189339 | 0.2475          |
| Left to right inter-hemispheric connectivity  | 0.0044638 | 0.011038  | 171 | 0.01493   | -0.3477296 | <b>0.0339</b>   |
| Right to left inter-hemispheric connectivity  | 0.0045673 | 0.008931  | 181 | 0.02633   | -0.3173285 | 0.0564          |
| FA                                            |           |           |     |           |            |                 |
| Left to left intra-hemispheric connectivity   | 0.04944   | 0.06055   | 151 | 0.004141  | -0.4096066 | <b>0.01</b>     |
| Right to right intra-hemispheric connectivity | 0.04583   | 0.06263   | 96  | 3.546e-05 | -0.5907427 | <b>1.27e-04</b> |
| Left to right inter-hemispheric connectivity  | 0.0013239 | 0.018026  | 6   | 2.122e-12 | -1.003748  | <b>5.31e-11</b> |
| Right to left inter-hemispheric connectivity  | 0.0012975 | 0.018169  | 7   | 3.183e-12 | -0.9956299 | <b>5.97e-11</b> |

Note: Differences between the AgCC and TDC groups were examined using the Wilcoxon Signed-Ranks test. All p-values that survived false discovery rate (FDR) correction ( $q < 0.05$ ) are indicated in bold.

## Functional Connectivity

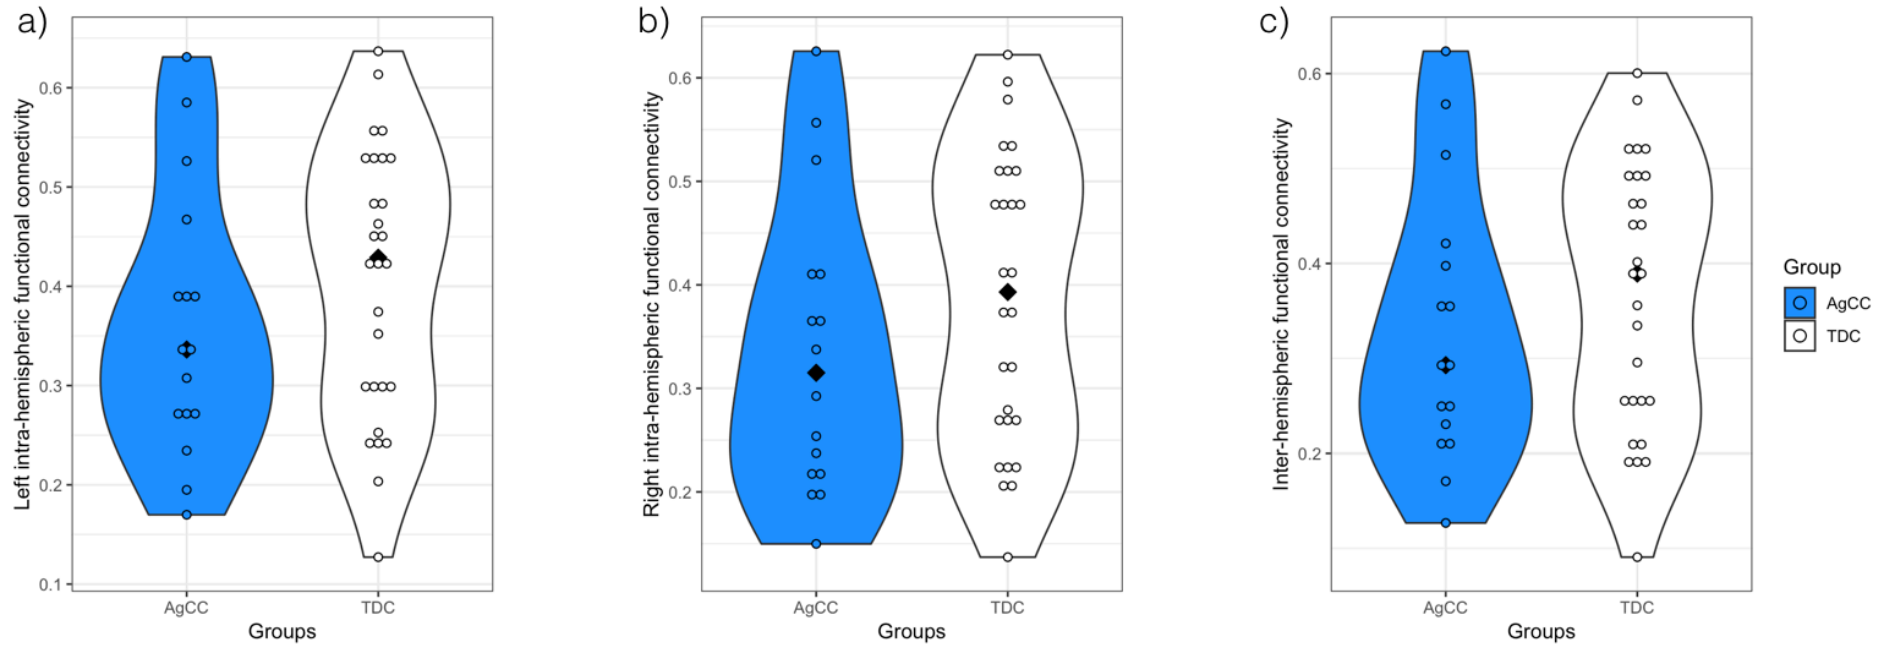

**Fig. S2.** Whole brain FC within: a) right intra-hemispheric regions; b) left intra-hemispheric regions; and c) inter-hemispheric regions, in children with AgCC (in blue) and typically developing controls (TDC, in white). Black square shows the median for each group.

**Table S6.** Whole Brain FC in the AgCC (n=16) and TDC (n=28) groups

|                                     | AgCC (median) | TDC (median) | Group Comparison |        |            |        |
|-------------------------------------|---------------|--------------|------------------|--------|------------|--------|
|                                     |               |              | W                | p      | r          | q      |
| Left to left intra-hemispheric FC   | 0.3363        | 0.4288       | 182              | 0.315  | -0.1514734 | 0.4458 |
| Right to right intra-hemispheric FC | 0.3151        | 0.3931       | 174              | 0.23   | -0.1809716 | 0.4012 |
| Left to right inter-hemispheric FC  | 0.2929        | 0.38934      | 186              | 0.3643 | -0.1367763 | 0.4595 |

Note: Differences between the AgCC and the TDC groups were examined using the Wilcoxon Signed-Ranks test. All p-values that survived false discovery rate (FDR) correction ( $q < 0.05$ ) are indicated in bold.

**Table S7.** Whole Brain FC in the complete AgCC (n=10) and partial (n=6) groups

|                                     | Complete AgCC (median) | Partial AgCC (median) | Group Comparison |        |            |        |
|-------------------------------------|------------------------|-----------------------|------------------|--------|------------|--------|
|                                     |                        |                       | W                | p      | r          | q      |
| Left to left intra-hemispheric FC   | 0.3619                 | 0.2909                | 39               | 0.3676 | -0.2252293 | 0.4595 |
| Right to right intra-hemispheric FC | 0.3258                 | 0.2402                | 39               | 0.3676 | -0.2252293 | 0.4595 |
| Left to right inter-hemispheric FC  | 0.3520                 | 0.2289                | 37               | 0.4923 | -0.1716806 | 0.5511 |

Note: Group differences were examined using the Wilcoxon Signed-Ranks test. All p-values that survived false discovery rate (FDR) correction ( $q < 0.05$ ) are indicated in bold.

**Table S8.** Whole Brain FC in the isolated (n=6) and complex (n=10) AgCC groups

|                                     | Isolated AgCC (median) | Complex AgCC (median) | Group Comparison |        |            |        |
|-------------------------------------|------------------------|-----------------------|------------------|--------|------------|--------|
|                                     |                        |                       | W                | p      | r          | q      |
| Left to left intra-hemispheric FC   | 0.3857                 | 0.3193                | 38               | 0.4278 | -0.198231  | 0.5093 |
| Right to right intra-hemispheric FC | 0.3651                 | 0.2650                | 40               | 0.3132 | -0.2521394 | 0.4458 |
| Left to right inter-hemispheric FC  | 0.3549                 | 0.2679                | 39               | 0.3676 | -0.2252293 | 0.4595 |

Note: Group differences were examined using the Wilcoxon Signed-Ranks test. All p-values that survived false discovery rate (FDR) correction ( $q < 0.05$ ) are indicated in bold.



**Table S9.** FC of the different cortical regions in the AgCC (n=16) and the TDC (n=28) groups

|                                     | AgCC (median) | TD (median) | Group Comparison |        |                 |        |
|-------------------------------------|---------------|-------------|------------------|--------|-----------------|--------|
|                                     |               |             | W                | p      | r               | q      |
| <b>FRONTAL REGION</b>               |               |             |                  |        |                 |        |
| Left to left intra-hemispheric FC   | 0.2999        | 0.4419      | 177              | 0.2598 | -0.1698923      | 0.4043 |
| Right to right intra-hemispheric FC | 0.25315       | 0.3926      | 208              | 0.7084 | -<br>0.05638768 | 0.7278 |
| Left to right inter-hemispheric FC  | 0.3101        | 0.4002      | 176              | 0.2496 | -0.1735829      | 0.4043 |
| Right to left inter-hemispheric FC  | 0.3009        | 0.38743     | 193              | 0.461  | -0.1111264      | 0.5319 |
| <b>PARIETAL REGION</b>              |               |             |                  |        |                 |        |
| Left to left intra-hemispheric FC   | 0.35496       | 0.43660     | 192              | 0.4464 | -0.1147857      | 0.5231 |
| Right to right intra-hemispheric FC | 0.3015        | 0.41264     | 197              | 0.5221 | -<br>0.09650343 | 0.5758 |
| Left to right inter-hemispheric FC  | 0.31822       | 0.4275      | 187              | 0.3773 | -0.1331069      | 0.4639 |
| Right to left inter-hemispheric FC  | 0.3495        | 0.42228     | 198              | 0.538  | -<br>0.09285106 | 0.5848 |
| <b>TEMPORAL REGION</b>              |               |             |                  |        |                 |        |
| Left to left intra-hemispheric FC   | 0.3626        | 0.4237      | 172              | 0.2115 | -0.1883704      | 0.3777 |
| Right to right intra-hemispheric FC | 0.3134        | 0.3729      | 183              | 0.3269 | -0.1477962      | 0.4540 |
| Left to right inter-hemispheric FC  | 0.3136        | 0.3660      | 177              | 0.2598 | -0.1698923      | 0.4043 |
| Right to left inter-hemispheric FC  | 0.2874        | 0.3703      | 178              | 0.2703 | -0.166204       | 0.4043 |
| <b>OCCIPITAL REGION</b>             |               |             |                  |        |                 |        |
| Left to left intra-hemispheric FC   | 0.3609        | 0.41263     | 175              | 0.2396 | -0.177276       | 0.4043 |
| Right to right intra-hemispheric FC | 0.3468        | 0.3704      | 177              | 0.2598 | -0.1698923      | 0.4043 |
| Left to right inter-hemispheric FC  | 0.34826       | 0.3679      | 178              | 0.2703 | -0.166204       | 0.4043 |
| Right to left inter-hemispheric FC  | 0.3580        | 0.3792      | 163              | 0.1412 | -0.221804       | 0.2648 |

Note: Group differences were examined using the Wilcoxon Signed-Ranks test. All p-values that survived false discovery rate (FDR) correction ( $q < 0.05$ ) are indicated in bold.

**Table S10.** Group scores of AgCC (n=16) and TDC (n=28) on all neurobehavioural measures included in the PLS analysis. Median values and group comparisons are shown.

|                                             | AgCC,<br>median | TDC,<br>median | Group comparison |           |            |                    |
|---------------------------------------------|-----------------|----------------|------------------|-----------|------------|--------------------|
|                                             |                 |                | W                | p         | r          | q                  |
| <b>General Cognitive Functioning</b>        |                 |                |                  |           |            |                    |
| VIQ                                         | 71.5            | 109.0          | 62               | 8.085e-05 | -0.5942583 | <b>0.000222338</b> |
| PIQ                                         | 86              | 116            | 33               | 3.261e-06 | -0.7015613 | <b>0.00003817</b>  |
| FSIQ                                        | 76.0            | 114.5          | 45.5             | 1.376e-05 | -0.6554345 | <b>0.000090816</b> |
| <b>Verbal short term and working memory</b> |                 |                |                  |           |            |                    |
| Short-term memory                           | 7.5             | 11             | 175.5            | 0.237     | -0.1782894 | 0.24440625         |
| Working memory                              | 8               | 11             | 107              | 0.004264  | -0.4308538 | <b>0.006117913</b> |
| Digit span total                            | 8               | 10             | 130              | 0.02197   | -0.3453745 | <b>0.025893214</b> |
| <b>Executive and attention functions</b>    |                 |                |                  |           |            |                    |
| Visual scanning spaceships                  | 7               | 11             | 114.5            | 0.007245  | -0.4048364 | <b>0.0095634</b>   |
| Visual search speed                         | 5               | 10             | 57               | 4.441e-05 | -0.6155723 | <b>0.00014103</b>  |
| Visual selective attention                  | 6.5             | 10             | 93.5             | 0.00135   | -0.4831971 | <b>0.002344737</b> |
| Sustained auditory attention                | 9.5             | 10             | 187.5            | 0.376     | -0.1334535 | 0.376              |
| Dual task                                   | 6               | 7              | 131.5            | 0.02318   | -0.3422752 | <b>0.026377241</b> |
| Divided auditory attention                  | 6.5             | 11             | 67.5             | 0.0001288 | -0.5772047 | <b>0.000326954</b> |
| Inhibition                                  | 5.5             | 8.0            | 120.5            | 0.01143   | -0.3813207 | <b>0.01397</b>     |
| Visual scanning numbers                     | 8.5             | 12             | 95               | 0.001617  | -0.4753013 | <b>0.002561429</b> |
| Number sequencing                           | 7.0             | 12.5           | 23.5             | 9.204e-07 | -0.7399005 | <b>3.03732E-05</b> |
| Letter sequencing                           | 7.5             | 12             | 53               | 2.742e-05 | -0.6322544 | <b>0.000136107</b> |
| Switching                                   | 7               | 12             | 39               | 5.41e-06  | -0.6856695 | <b>4.46325E-05</b> |
| Motor speed                                 | 8.5             | 11             | 58.5             | 3.514e-05 | -0.6237226 | <b>0.000136107</b> |
| Letter fluency                              | 7.5             | 11             | 117.5            | 0.009373  | -0.3916867 | <b>0.0118965</b>   |
| Category fluency                            | 8               | 13             | 55.5             | 3.712e-05 | -0.6218268 | <b>0.000136107</b> |
| Verbal switching                            | 6               | 11             | 73               | 0.0002135 | -0.5581697 | <b>0.0004697</b>   |
| Verbal switching accuracy                   | 7.0             | 11.5           | 34.5             | 3.47e-06  | -0.6996301 | <b>0.00003817</b>  |
| Colour naming                               | 7.5             | 11             | 108.5            | 0.004709  | -0.4260812 | <b>0.006474875</b> |
| Colour reading                              | 7.0             | 10.5           | 83               | 0.0005184 | -0.5232801 | <b>0.001006306</b> |
| Interference task                           | 7.5             | 11.5           | 101              | 0.002573  | -0.4544707 | <b>0.0038595</b>   |
| Inhibition switching                        | 7.5             | 11             | 95.5             | 0.00163   | -0.4749436 | <b>0.002561429</b> |

| Verbal learning and memory |       |       |       |           |            |                    |
|----------------------------|-------|-------|-------|-----------|------------|--------------------|
| Verbal learning            | 8.5   | 7.0   | 277   | 0.1979    | -0.1940994 | 0.210667742        |
| Verbal immediate recall    | 5     | 10    | 58.5  | 4.701e-05 | -0.6135757 | <b>0.00014103</b>  |
| Verbal total recall        | 4     | 10    | 69    | 0.0001525 | -0.5709019 | <b>0.000359464</b> |
| Verbal delayed recall      | 5     | 10    | 54    | 3.217e-05 | -0.6267752 | <b>0.000136107</b> |
| Verbal delayed recognition | 11    | 10    | 279   | 0.1711    | -0.2063326 | 0.18821            |
| Social functions           |       |       |       |           |            |                    |
| Social skills              | 88.5  | 108.5 | 87    | 0.0008629 | -0.5022856 | <b>0.001581983</b> |
| Problem behaviour          | 121.5 | 92.0  | 374.5 | 0.0002497 | -0.5521569 | <b>0.000515006</b> |

Note: Differences between the AgCC and TDC groups were examined using the Wilcoxon Signed-Ranks test. All p-values that survived false discovery rate (FDR) correction ( $q < 0.05$ ) are indicated in bold.

**Table S11.** PLS results for SC in the AgCC and TDC groups, corresponding to Figure 3. The table shows original neurobehavioural saliences (bootstrap estimate standard deviation) and bootstrap ratio Z-scores; as well as structural brain connectivity saliences (bootstrap estimate standard deviation) and bootstrap ratio Z-scores.

| Salienc type:<br>Neurobehavioural measures | AgCC                                            |                          | TDC                                             |                          |
|--------------------------------------------|-------------------------------------------------|--------------------------|-------------------------------------------------|--------------------------|
|                                            | Salienc (bootstrap estimate standard deviation) | Bootstrap ratio Z-scores | Salienc (bootstrap estimate standard deviation) | Bootstrap ratio z-scores |
| VIQ                                        | 0.05 (0.03)                                     | 1.640                    | -0.229 (0.032)                                  | -7.152                   |
| PIQ                                        | 0.084 (0.034)                                   | 2.479                    | 0.037 (0.036)                                   | 1.024                    |
| FSIQ                                       | 0.085 (0.047)                                   | 1.825                    | -0.12 (0.036)                                   | -3.350                   |
| Social skills                              | -0.061 (0.037)                                  | -1.632                   | -0.011 (0.035)                                  | -0.324                   |
| Problem behaviour                          | 0.016 (0.034)                                   | 0.454                    | 0.027 (0.033)                                   | 0.803                    |
| Visual scanning spaceships                 | 0.235 (0.031)                                   | 7.490                    | 0.03 (0.044)                                    | 0.684                    |
| Visual search speed                        | 0.106 (0.033)                                   | 3.180                    | -0.051 (0.036)                                  | -1.443                   |
| Visual selective attention                 | 0.07 (0.033)                                    | 2.110                    | -0.029 (0.041)                                  | -0.702                   |
| Sustained auditory attention               | 0.257 (0.04)                                    | 6.490                    | -0.021 (0.035)                                  | -0.606                   |
| Dual task                                  | 0.174 (0.036)                                   | 4.858                    | 0.123 (0.036)                                   | 3.395                    |
| Divided auditory attention                 | 0.092 (0.034)                                   | 2.677                    | 0.118 (0.035)                                   | 3.341                    |
| Inhibition                                 | 0.157 (0.033)                                   | 4.745                    | -0.049 (0.046)                                  | -1.062                   |
| Short-term memory                          | -0.078 (0.031)                                  | -2.501                   | 0.029 (0.045)                                   | 0.656                    |
| Working memory                             | 0.088 (0.029)                                   | 3.077                    | 0.117 (0.034)                                   | 3.430                    |
| Digit span total                           | 0.023 (0.034)                                   | 0.689                    | 0.077 (0.043)                                   | 1.814                    |
| Verbal learning                            | 0.251 (0.04)                                    | 6.239                    | -0.076 (0.034)                                  | -2.239                   |
| Verbal immediate recall                    | 0.006 (0.042)                                   | 0.147                    | -0.2 (0.031)                                    | -6.344                   |
| Verbal total recall                        | 0.093 (0.057)                                   | 1.635                    | -0.185 (0.036)                                  | -5.123                   |
| Verbal delayed recall                      | 0.04 (0.033)                                    | 1.195                    | -0.211 (0.032)                                  | -6.602                   |
| Verbal delayed recognition                 | 0.261 (0.04)                                    | 6.506                    | 0.038 (0.036)                                   | 1.045                    |
| Visual scanning numbers                    | -0.027 (0.034)                                  | -0.776                   | 0.056 (0.043)                                   | 1.308                    |
| Number sequencing                          | 0.022 (0.046)                                   | 0.482                    | -0.15 (0.033)                                   | -4.598                   |
| Letter sequencing                          | 0.094 (0.035)                                   | 2.704                    | -0.042 (0.03)                                   | -1.398                   |
| Switching                                  | 0.193 (0.035)                                   | 5.468                    | 0.025 (0.037)                                   | 0.658                    |
| Motor speed                                | 0.119 (0.044)                                   | 2.730                    | 0.037 (0.041)                                   | 0.905                    |
| Letter fluency                             | 0.133 (0.029)                                   | 4.533                    | -0.257 (0.036)                                  | -7.083                   |
| Category fluency                           | 0.043 (0.034)                                   | 1.259                    | 0.053 (0.027)                                   | 2.000                    |
| Verbal switching                           | -0.143 (0.064)                                  | -2.238                   | -0.136 (0.042)                                  | -3.218                   |

|                           |                |        |                |        |
|---------------------------|----------------|--------|----------------|--------|
| Verbal switching accuracy | -0.178 (0.068) | -2.635 | -0.119 (0.035) | -3.355 |
| Color naming              | 0.174 (0.045)  | 3.885  | -0.146 (0.041) | -3.534 |
| Color reading             | 0.171 (0.029)  | 5.822  | 0.065 (0.035)  | 1.835  |
| Interference task         | 0.124 (0.048)  | 2.586  | -0.08 (0.042)  | -1.919 |
| Inhibition switching      | 0.021 (0.035)  | 0.600  | 0.003 (0.036)  | 0.082  |

| <b>Saliency type:<br/>Structural connectivity</b> | <b>In both the AgCC and TDC groups</b>           |                          |
|---------------------------------------------------|--------------------------------------------------|--------------------------|
|                                                   | Saliency (bootstrap estimate standard deviation) | Bootstrap ratio z-scores |
| <b>Mean FA on streamlines:</b>                    |                                                  |                          |
| Frontal left to whole brain left                  | 0.128 (0.055)                                    | 2.381                    |
| Frontal left to whole brain right                 | -0.1 (0.066)                                     | -1.470                   |
| Frontal right to whole brain left                 | -0.105 (0.052)                                   | -1.938                   |
| Frontal right to whole brain right                | 0.152 (0.05)                                     | 2.997                    |
| Occipital left to whole brain left                | 0.043 (0.063)                                    | 0.691                    |
| Occipital left to whole brain right               | -0.228 (0.053)                                   | -4.450                   |
| Occipital right to whole brain left               | -0.225 (0.052)                                   | -4.195                   |
| Occipital right to whole brain right              | 0.029 (0.06)                                     | 0.488                    |
| Parietal left to whole brain left                 | 0.254 (0.053)                                    | 4.898                    |
| Parietal left to whole brain right                | -0.228 (0.091)                                   | -2.642                   |
| Parietal right to whole brain left                | -0.234 (0.077)                                   | -2.883                   |
| Parietal right to whole brain right               | 0.144 (0.055)                                    | 2.603                    |
| Temporal left to whole brain left                 | 0.088 (0.065)                                    | 1.338                    |
| Temporal left to whole brain right                | -0.165 (0.059)                                   | -3.042                   |
| Temporal right to whole brain left                | -0.179 (0.053)                                   | -3.392                   |
| Temporal right to whole brain right               | 0.085 (0.048)                                    | 1.685                    |
| <b>Number of streamlines:</b>                     |                                                  |                          |
| Frontal left to whole brain left                  | 0.026 (0.054)                                    | 0.414                    |
| Frontal left to whole brain right                 | -0.159 (0.057)                                   | -2.912                   |
| Frontal right to whole brain left                 | -0.158 (0.059)                                   | -2.808                   |
| Frontal right to whole brain right                | 0.098 (0.069)                                    | 1.551                    |
| Occipital left to whole brain left                | 0.132 (0.054)                                    | 2.527                    |
| Occipital left to whole brain right               | -0.091 (0.059)                                   | -1.553                   |
| Occipital right to whole brain left               | -0.098 (0.054)                                   | -1.761                   |
| Occipital right to whole brain right              | 0.054 (0.058)                                    | 0.911                    |

|                                     |                |        |
|-------------------------------------|----------------|--------|
| Parietal left to whole brain left   | 0.202 (0.061)  | 3.430  |
| Parietal left to whole brain right  | -0.204 (0.052) | -3.847 |
| Parietal right to whole brain left  | -0.226 (0.054) | -4.042 |
| Parietal right to whole brain right | 0.134 (0.06)   | 2.308  |
| Temporal left to whole brain left   | 0.129 (0.059)  | 2.303  |
| Temporal left to whole brain right  | -0.137 (0.058) | -2.362 |
| Temporal right to whole brain left  | -0.15 (0.053)  | -2.736 |
| Temporal right to whole brain right | 0.098 (0.063)  | 1.571  |

**Table S12.** PLS results for FC in the AgCC and TDC groups, corresponding to Figure 4. The table shows original neurobehavioural saliences (bootstrap estimate standard deviation) and bootstrap ratio Z-scores; as well as functional brain connectivity saliences (bootstrap estimate standard deviation) and bootstrap ratio Z-scores.

| Saliency type:<br>Neurobehavioural measures | AgCC                                             |                          | TDC            |                          |
|---------------------------------------------|--------------------------------------------------|--------------------------|----------------|--------------------------|
|                                             | Saliency (bootstrap estimate standard deviation) | Bootstrap ratio z-scores | Saliency       | Bootstrap ratio z-scores |
| VIQ                                         | -0.005 (0.057)                                   | -0.081                   | 0.275 (0.065)  | 4.226                    |
| PIQ                                         | -0.046 (0.041)                                   | -1.105                   | -0.111 (0.059) | -1.889                   |
| FSIQ                                        | -0.027 (0.044)                                   | -0.611                   | 0.1 (0.051)    | 1.960                    |
| Social skills                               | 0.051 (0.061)                                    | 0.838                    | 0.047 (0.068)  | 0.683                    |
| Problem behaviour                           | -0.047 (0.072)                                   | -0.658                   | 0.03 (0.072)   | 0.414                    |
| Visual scanning spaceships                  | 0.194 (0.045)                                    | 4.328                    | 0.177 (0.068)  | 2.607                    |
| Visual search speed                         | 0.065 (0.06)                                     | 1.084                    | 0.184 (0.055)  | 3.342                    |
| Visual selective attention                  | 0.042 (0.063)                                    | 0.656                    | 0.21 (0.061)   | 3.431                    |
| Sustained auditory attention                | 0.031 (0.054)                                    | 0.577                    | -0.125 (0.068) | -1.825                   |
| Dual task                                   | 0.163 (0.053)                                    | 3.050                    | -0.301 (0.071) | -4.267                   |
| Divided auditory attention                  | 0.091 (0.043)                                    | 2.113                    | -0.366 (0.065) | -5.640                   |
| Inhibition                                  | 0.119 (0.056)                                    | 2.136                    | 0.102 (0.073)  | 1.392                    |
| Short-term memory                           | -0.094 (0.055)                                   | -1.698                   | -0.087 (0.065) | -1.333                   |
| Working memory                              | -0.067 (0.034)                                   | -1.960                   | -0.082 (0.05)  | -1.636                   |
| Digit span total                            | -0.103 (0.04)                                    | -2.580                   | -0.082 (0.048) | -1.702                   |
| Verbal learning                             | 0.035 (0.055)                                    | 0.634                    | 0.177 (0.073)  | 2.416                    |
| Verbal immediate recall                     | -0.169 (0.047)                                   | -3.579                   | 0.007 (0.065)  | 0.103                    |
| Verbal total recall                         | -0.061 (0.049)                                   | -1.249                   | 0.156 (0.065)  | 2.392                    |
| Verbal delayed recall                       | -0.09 (0.06)                                     | -1.498                   | 0.064 (0.067)  | 0.961                    |
| Verbal delayed recognition                  | -0.024 (0.047)                                   | -0.502                   | 0.148 (0.072)  | 2.049                    |
| Visual scanning numbers                     | 0.059 (0.058)                                    | 1.017                    | 0.059 (0.072)  | 0.809                    |
| Number sequencing                           | 0.202 (0.046)                                    | 4.405                    | 0.163 (0.05)   | 3.267                    |
| Letter sequencing                           | 0.084 (0.046)                                    | 1.836                    | 0.113 (0.059)  | 1.931                    |

|                                                   |                                                        |                          |                |        |
|---------------------------------------------------|--------------------------------------------------------|--------------------------|----------------|--------|
| Switching                                         | 0.032 (0.056)                                          | 0.578                    | -0.03 (0.064)  | -0.463 |
| Motor speed                                       | 0.106 (0.051)                                          | 2.063                    | -0.022 (0.055) | -0.408 |
| Letter fluency                                    | 0.076 (0.068)                                          | 1.123                    | 0.174 (0.069)  | 2.536  |
| Category fluency                                  | 0.039 (0.059)                                          | 0.666                    | 0.087 (0.064)  | 1.363  |
| Verbal switching                                  | -0.06 (0.052)                                          | -1.165                   | 0.087 (0.056)  | 1.550  |
| Verbal switching accuracy                         | 0.076 (0.052)                                          | 1.472                    | 0.075 (0.056)  | 1.339  |
| Color naming                                      | 0.226 (0.049)                                          | 4.655                    | 0.054 (0.054)  | 1.000  |
| Color reading                                     | 0.092 (0.037)                                          | 2.462                    | 0.086 (0.052)  | 1.656  |
| Interference task                                 | -0.114 (0.056)                                         | -2.041                   | 0.08 (0.075)   | 1.068  |
| Inhibition switching                              | 0.06 (0.065)                                           | 0.916                    | 0.003 (0.06)   | 0.042  |
| <b>Saliency type:<br/>Functional connectivity</b> | <b>In both the AgCC and the TDC groups</b>             |                          |                |        |
|                                                   | Saliency (bootstrap<br>estimate standard<br>deviation) | Bootstrap ratio z-scores |                |        |
| Frontal left to whole brain left                  | 0.223 (0.073)                                          | 3.045                    |                |        |
| Frontal left to whole brain right                 | 0.226 (0.093)                                          | 2.437                    |                |        |
| Frontal right to whole brain left                 | 0.232 (0.068)                                          | 3.400                    |                |        |
| Frontal right to whole brain right                | 0.233 (0.073)                                          | 3.186                    |                |        |
| Occipital left to whole brain left                | 0.208 (0.07)                                           | 2.973                    |                |        |
| Occipital left to whole brain right               | 0.225 (0.076)                                          | 2.971                    |                |        |
| Occipital right to whole brain left               | 0.21 (0.069)                                           | 3.049                    |                |        |
| Occipital right to whole brain right              | 0.22 (0.084)                                           | 2.623                    |                |        |
| Parietal left to whole brain left                 | 0.216 (0.094)                                          | 2.292                    |                |        |
| Parietal left to whole brain right                | 0.219 (0.094)                                          | 2.333                    |                |        |
| Parietal right to whole brain left                | 0.216 (0.08)                                           | 2.717                    |                |        |
| Parietal right to whole brain right               | 0.22 (0.083)                                           | 2.660                    |                |        |
| Temporal left to whole brain left                 | 0.223 (0.071)                                          | 3.160                    |                |        |
| Temporal left to whole brain right                | 0.22 (0.088)                                           | 2.496                    |                |        |
| Temporal right to whole brain left                | 0.219 (0.071)                                          | 3.107                    |                |        |
| Temporal right to whole brain right               | 0.226 (0.082)                                          | 2.774                    |                |        |



## SUPPLEMENTARY INFORMATION REFERENCES

1. Tournier JD (2010) MRtrix package. (Brain Research Institute, Melbourne, Australia).
2. Smith SM (2002) Fast robust automated brain extraction. *Human brain mapping* 17(3):143-155.
3. Obertino S, *et al.* (2017) Exploiting Machine Learning Principles for Assessing the Fingerprinting Potential of Connectivity Features. in *Computational Diffusion MRI Workshop (CDMRI) of International Conference on Medical Image Computing and Computer-Assisted Intervention (MICCAI)*, ed Springer C, pp 175-188.
4. Tournier JD, *et al.* (2008) Resolving crossing fibres using constrained spherical deconvolution: Validation using diffusion-weighted imaging phantom data. *Neuroimage* 42(2):617-625.
5. Tournier JD, Calamante F, & Connelly A (2007) Robust determination of the fibre orientation distribution in diffusion MRI: non-negativity constrained super-resolved spherical deconvolution. *NeuroImage* 35(4):1459-1472.
6. Tax CM, Jeurissen B, Vos SB, Viergever MA, & Leemans A (2014) Recursive calibration of the fiber response function for spherical deconvolution of diffusion MRI data. *NeuroImage* 86:67-80.
7. Smith RE, Tournier JD, Calamante F, & Connelly A (2013) SIFT: Spherical-deconvolution informed filtering of tractograms. *NeuroImage* 67:298-312.
8. Fan L, *et al.* (2016) The Human Brainnetome Atlas: A New Brain Atlas Based on Connectional Architecture. *Cerebral Cortex* 26(8):3508-3526.
9. Power JD, *et al.* (2014) Methods to detect, characterize, and remove motion artifact in resting state fMRI. *NeuroImage* 84:320-341.
10. Power JD, Barnes KA, Snyder AZ, Schlaggar BL, & Petersen SE (2012) Spurious but systematic correlations in functional connectivity MRI networks arise from subject motion. *NeuroImage* 59(3):2142-2154.
11. Leonardi N, *et al.* (2013) Principal components of functional connectivity: a new approach to study dynamic brain connectivity during rest. *NeuroImage* 83:937-950.
12. Delis D, Kaplan E, & Kramer J (2001) *Delis-Kaplan Executive Function System (DKEFS)* (The Psychological Corporation, San Antonio, TX).
13. Delis DC, Kramer JH, Kaplan E, & Ober BA (1994) *The California verbal learning test-Children's version* (The Psychological Corporation, San Antonio, TX).
14. Cohen MJ (1997) *Examiner's manual: Children's Memory Scale* (Brace and Compagny, San Antonio: Harcourt).
15. McIntosh AR & Lobaugh NJ (2004) Partial least squares analysis of neuroimaging data: applications and advances. *NeuroImage* 23 Suppl 1:S250-263.

16. Kebets V, et al. (2019) Somatosensory-Motor Dysconnectivity Spans Multiple Transdiagnostic Dimensions of Psychopathology. *Biol Psychiat* 0(0).
17. Zoller D, et al. (2019) Large-Scale Brain Network Dynamics Provide a Measure of Psychosis and Anxiety in 22q11.2 Deletion Syndrome. *Biol Psychiat*.
18. Wechsler D (1999) *Wechsler Abbreviated Scale of Intelligence (WASI)* (Psychological Corporation, San Antonio, TX).
19. Wechsler D (2003) *Manual for the Wechsler Intelligence Scale for Children-IV* (Psychological Corporation, New York).
20. Manly T, Robertson I, Anderson V, & Nimmo-Smith I (1999) *Test of everyday attention for children* (Thames Valley Test Company, Cambridge, UK).
21. Greenham M, Spencer-Smith MM, Anderson PJ, Coleman L, & Anderson VA (2010) Social functioning in children with brain insult. *Front Hum Neurosci* 4:22.
